# Supplementary material for: Correlating chemical diversity with taxonomic distance for discovery of natural products in myxobacteria
Source: PubMed Central journal article supplement (PMC5824889; doi:10.1038/s41467-018-03184-1), 2018-02-23
Supplement: 41467_2018_3184_MOESM2_ESM.pdf [file 41467_2018_3184_MOESM2_ESM.pdf]

## **Description of Additional Supplementary Files**

File Name: Supplementary Data 1

Description: List of myxobacterial strains used for statistical analysis.
